# Supplementary material
Source: PubMed Central journal article supplement (PMC4550220)
Supplement: NIHMS693832-supplement.pdf [file NIHMS693832-supplement.pdf]

Supplemental Material: Expectation modulates neural representations of valence throughout the human brain

**Anatomical distribution of choice-direction selective electrodes** To assess whether the broad and heterogeneous anatomical distribution of valence-encoding electrodes was a general feature of HFA signals, we performed a control analysis where we studied the anatomical distribution of electrodes that encoded left/right choice direction. We repeated our analysis used to identify valence encoding electrodes (*Results*, pages 14-15, Figure 2), however, we identified electrodes that demonstrated significant differences in HFA when the subject selected the left button, compared to when they selected the right button (“direction-encoding”). In contrast to the broad and heterogeneous anatomical distribution of valence-encoding electrodes (Figure 2), we found that the anatomical distribution of direction-encoding electrodes was localized and homogeneous (Suppl. Table 1). Right-encoding electrodes (greater activity during right choice, compared to left choice) were more frequently observed than chance in only two regions—the left sensori-motor and parietal ROIs ( $t$ 's > 4.02, FDR-corrected  $p$ 's < 0.005). Similarly, a significant frequency of left-encoding electrodes were only found in the right sensorimotor and parietal ROIs ( $t$ 's > 4.74, FDR-corrected  $p$ 's < 0.003). These results suggest that the broad and heterogeneous anatomical distribution associated with valence-encoding electrodes is not a general feature of HFA.

[Table 1 about here.]

| Region of Interest          | number of electrodes | number of subjects | frequency of left-selective contacts; counts <i>t</i> -test results | frequency of right-selective contacts; counts <i>t</i> -test results |
|-----------------------------|----------------------|--------------------|---------------------------------------------------------------------|----------------------------------------------------------------------|
| L. OFC                      | 48                   | 15                 | 0.02; $p > 0.2$                                                     | 0.04; $p > 0.15$                                                     |
| R. OFC                      | 67                   | 16                 | 0.05; $p > 0.2$                                                     | 0.06; $p > 0.5$                                                      |
| L. dlPFC                    | 223                  | 21                 | 0.06; $p > 0.5$                                                     | 0.08; $p > 0.2$                                                      |
| R. dlPFC                    | 246                  | 19                 | 0.06; $p > 0.5$                                                     | 0.09; $p > 0.2$                                                      |
| L. vlPFC                    | 92                   | 18                 | 0.16; $p > 0.15$                                                    | 0.04; $p > 0.3$                                                      |
| R. vlPFC                    | 65                   | 16                 | 0; $t(15) = -10.6, p < 0.001$                                       | 0.03; $p > 0.5$                                                      |
| L. anterior medial frontal  | 138                  | 16                 | 0.06; $p > 0.5$                                                     | 0.08; $p > 0.4$                                                      |
| R. anterior medial frontal  | 149                  | 18                 | 0.05; $p > 0.2$                                                     | 0.06; $p > 0.5$                                                      |
| L. posterior medial frontal | 28                   | 7                  | 0.11; $p > 0.5$                                                     | 0.39; $t(6) = 2.25, p = 0.065$                                       |
| L. sensorimotor             | 277                  | 23                 | 0.04; $p > 0.5$                                                     | <b>0.27</b> ; $t(22) = 4.29, p < 0.001$                              |
| R. sensorimotor             | 262                  | 20                 | <b>0.39</b> ; $t(19) = 5.98, p < 0.001$                             | 0.04; $t(19) = -2.47, p = 0.023$                                     |
| L. parietal                 | 373                  | 26                 | 0.10; $p > 0.1$                                                     | <b>0.17</b> ; $t(25) = 4.01, p < 0.001$                              |
| R. parietal                 | 267                  | 19                 | <b>0.19</b> ; $t(18) = 4.74, p < 0.001$                             | 0.05; $p > 0.5$                                                      |
| L. temporal                 | 677                  | 28                 | 0.06; $p > .2$                                                      | 0.07; $p = 0.06$                                                     |
| R. temporal                 | 457                  | 27                 | 0.05; $p > 0.5$                                                     | 0.06; $p > 0.4$                                                      |
| L. fusiform                 | 98                   | 23                 | 0.02; $p > 0.2$                                                     | 0.06; $p > 0.5$                                                      |
| R. fusiform                 | 97                   | 17                 | 0.11; $p = 0.09$                                                    | 0.10; $p > 0.15$                                                     |
| L. occipital                | 162                  | 20                 | 0.10; $t(19) = 2.52, p = 0.020$                                     | 0.19; $t(19) = 2.46, p = 0.02$                                       |
| R. occipital                | 84                   | 19                 | 0.20; $t(18) = 2.36, p = 0.29$                                      | 0.19; $p = 0.072$                                                    |
| L. MTL                      | 100                  | 19                 | 0.09; $p > 0.2$                                                     | 0.09; $p > 0.2$                                                      |
| R. MTL                      | 52                   | 12                 | 0.08; $p > 0.4$                                                     | 0.06; $p > 0.5$                                                      |

Table 1: **Frequency of choice-direction encoding electrodes** For each region, we list the number of electrodes (column 1), number of subjects (column 2), frequency of left-selective electrodes (column 3), and frequency of right-selective electrodes (column 4). Positive *t*-statistics indicate frequencies that are greater than expected, whereas negative *t*-statistics indicate a frequencies that are lower than expected. Bold text in columns 3 and 4 indicates regions that showed choice-direction encoding electrodes more frequently than expected by chance (FDR-corrected  $p < 0.05$ ).
